# Supplementary material for: Impacts that pH and metal ion concentration have on the synthesis of bimetallic and trimetallic nanorods from gold seeds
Source: Royal Society of Chemistry journal article supplement (doi:10.1039/b500256g), 2005-01-01

## Impacts of pH and Metal Ion Concentration on the Synthesis of Bimetallic and Trimetallic Nanorods from Gold Seeds

Zusing Yang, Yang-Wei Lin, Wei-Lung Tseng, and Huan-Tsung Chang\*

Department of Chemistry, National Taiwan University, Taipei,  
Taiwan

Tel./fax: 011-886-2-23621963

E-mail: [changht@ntu.edu.tw](mailto:changht@ntu.edu.tw)

**Fig. S1** TEM image of the as-prepared gold NRs.

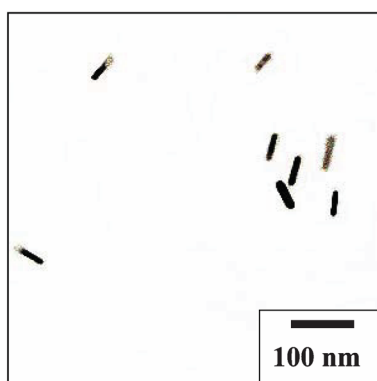

**Fig. S2** TEM images and UV spectra of the Au–Ag bimetallic NRs prepared in the presence of  $10^{-4}$  M  $\text{Fe}^{3+}$  at (a) pH 8.0, (b) pH 9.5, and (c) pH 10.5.

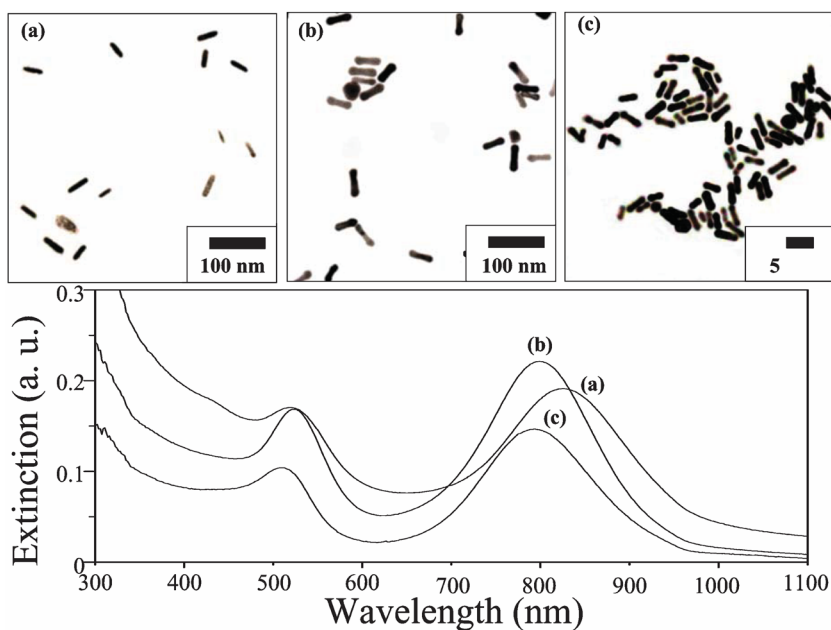

**Fig. S3** TEM images and UV spectra of the Au–Ag bimetallic NRs prepared in the presence of  $10^{-4}$  M  $\text{Co}^{2+}$  at (a) pH 8.0, (b) pH9.5, and (c) pH 10.5.

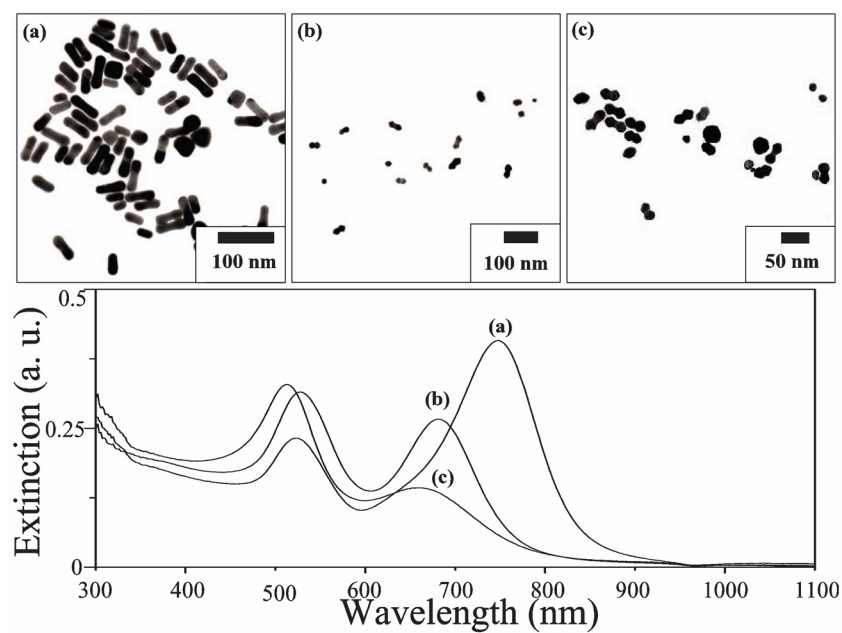

Supplement: b500256g.pdf [file b500256g.pdf]
